# Supplementary material
Source: PubMed Central journal article supplement (PMC4782935)
Supplement: NIHMS736516-supplement-2.pdf [file NIHMS736516-supplement-2.pdf]

|               | Percentage of anterograde | Percentage of retrograde | Percentage of stationary | Anterograde velocity ( $\mu\text{m}/\text{sec}$ ), mean $\pm$ SEM | Retrograde velocity ( $\mu\text{m}/\text{sec}$ ), mean $\pm$ SEM | Anterograde run length ( $\mu\text{m}$ ) | Retrograde run length ( $\mu\text{m}$ ) |
|---------------|---------------------------|--------------------------|--------------------------|-------------------------------------------------------------------|------------------------------------------------------------------|------------------------------------------|-----------------------------------------|
| <b>APP</b>    | 48.71                     | 18.46                    | 32.96                    | 1.74 $\pm$ 0.033                                                  | 1.52 $\pm$ 0.063                                                 | 5.51 $\pm$ 0.19                          | 4.95 $\pm$ 0.32                         |
| <b>BACE-1</b> | 55.57                     | 17.93                    | 26.48                    | 2.1 $\pm$ 0.061                                                   | 1.76 $\pm$ 0.074                                                 | 8.18 $\pm$ 0.44                          | 5.16 $\pm$ 0.35                         |
| <b>NPYss</b>  | 57.06                     | 22.68                    | 20.24                    | 2.51 $\pm$ 0.058                                                  | 1.82 $\pm$ 0.074                                                 | 6.21 $\pm$ 0.23                          | 4.83 $\pm$ 0.26                         |
| <b>Rab11</b>  | 11.54                     | 8.79                     | 79.66                    | 1.68 $\pm$ 0.14                                                   | 1.93 $\pm$ 0.1                                                   | 7.25 $\pm$ 0.45                          | 6.03 $\pm$ 0.76                         |
| <b>Rab5</b>   | 3.73                      | 3.68                     | 92.57                    | 1.54 $\pm$ 0.13                                                   | 1.2 $\pm$ .05                                                    | 3.7 $\pm$ 0.68                           | 2.74 $\pm$ 0.19                         |

Supplementary Table 1: Transport kinetics of various cargoes in axons

~ 360 APP, 300 BACE-1, 890 NPYss, 55 Rab11 and 120 Rab5 particles from 2-3 separate cultures were analyzed to calculate percentage of frequencies, velocities and run length in axons.
